# Supplementary material for: Gas-phase oxidation modification strategy of spent graphite from spent LiFePO4 with enhanced initial coulombic efficiency for lithium-ion battery anodes
Source: Royal Society of Chemistry journal article supplement (doi:10.1039/d1se01215k), 2021-01-01
Supplement: d1se01215k1.pdf [file d1se01215k1.pdf]

## Gas-phase oxidation modification strategy of spent graphite from spent $\text{LiFePO}_4$

### with Enhanced Initial Coulombic Efficiency for Lithium-Ion Battery Anodes

Zheng Li,<sup>a</sup> Songxian Li,<sup>a</sup> Tao Wang,<sup>a</sup> Kai Yang,<sup>a</sup> Zhongliang Tian,<sup>a\*</sup> Yanqing Lai,<sup>a</sup>

<sup>a</sup> School of Metallurgy and Environment, Central South University, Changsha 410082, China

#### \*Corresponding authors.

E-mail: tianzhongliang@csu.edu.cn

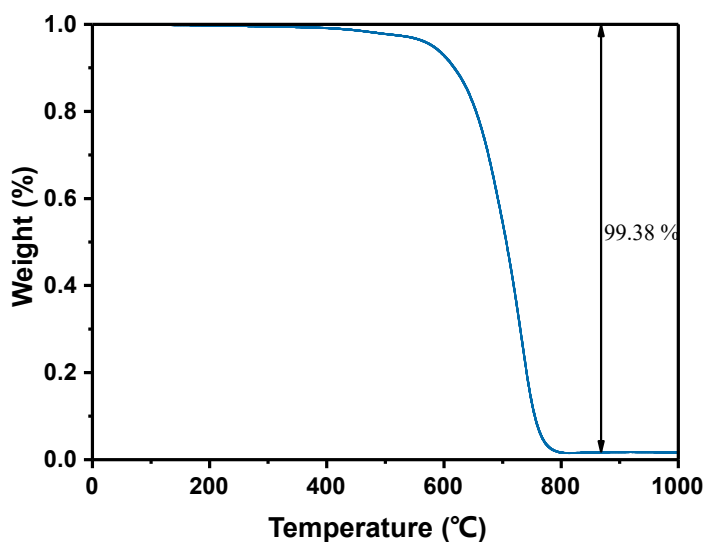

Figure S1  $\text{O}_2$  adsorption-desorption isotherms.

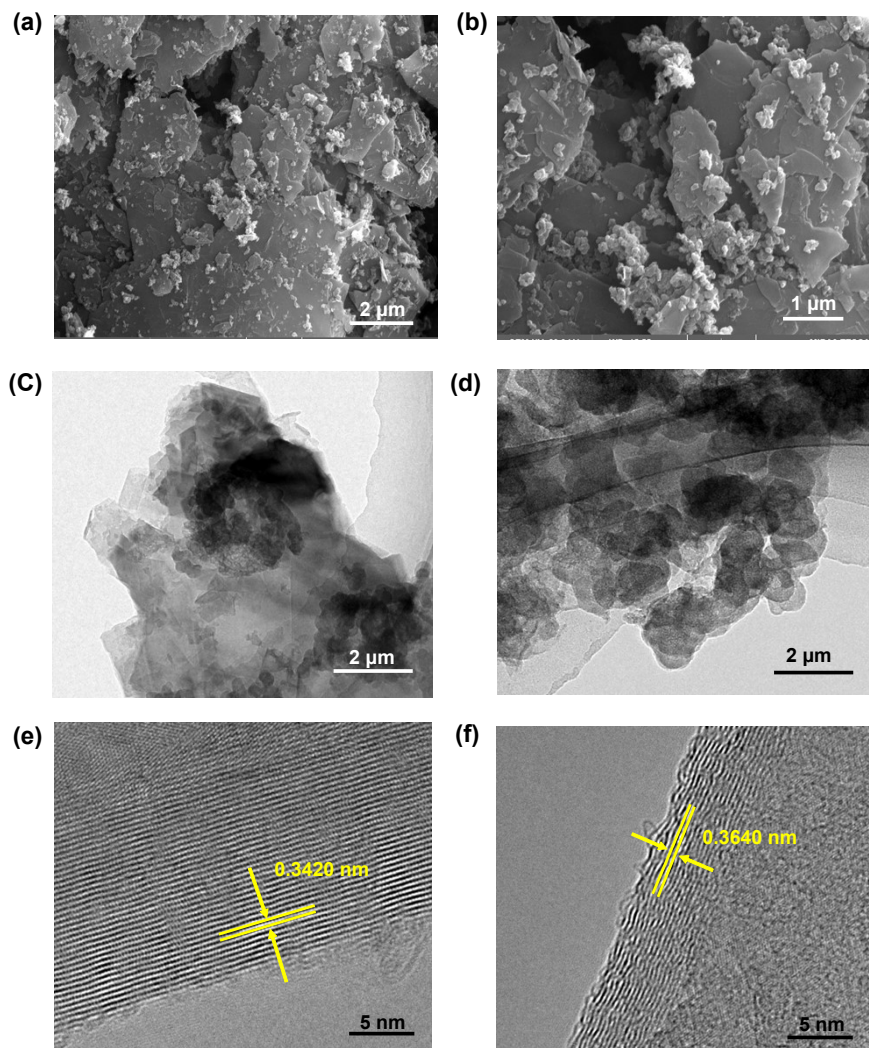

Figure S2 (a) and (b) SEM images and (c)–(f) TEM images of the SG sample with different magnifications.

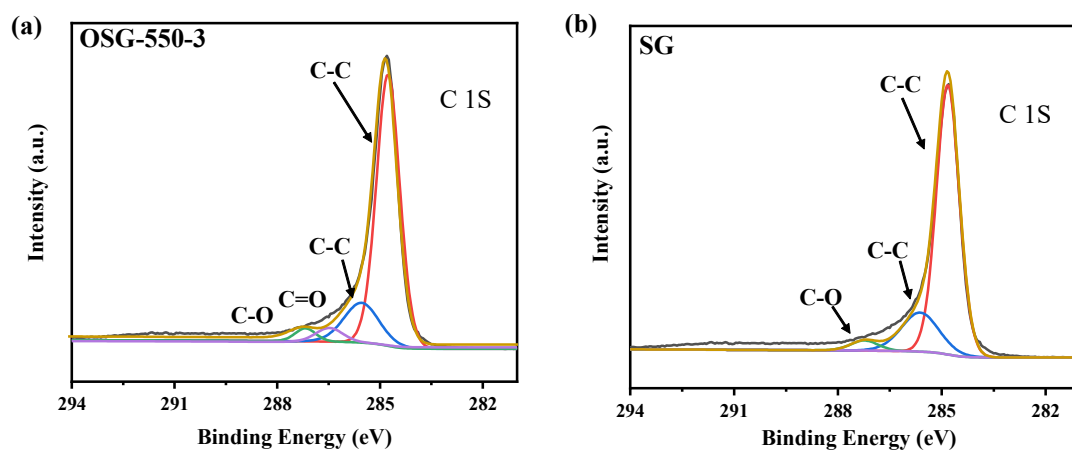

Figure S3 XPS C1s spectra of (a) OSG-550-3 and (b) SG.

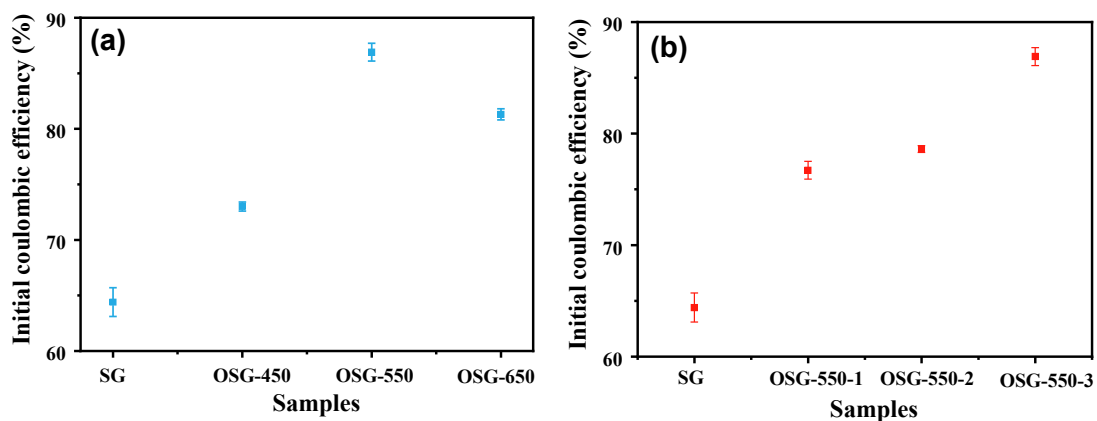

Figure S4 Initial coulombic efficiency with standard deviation bar per of OSG.

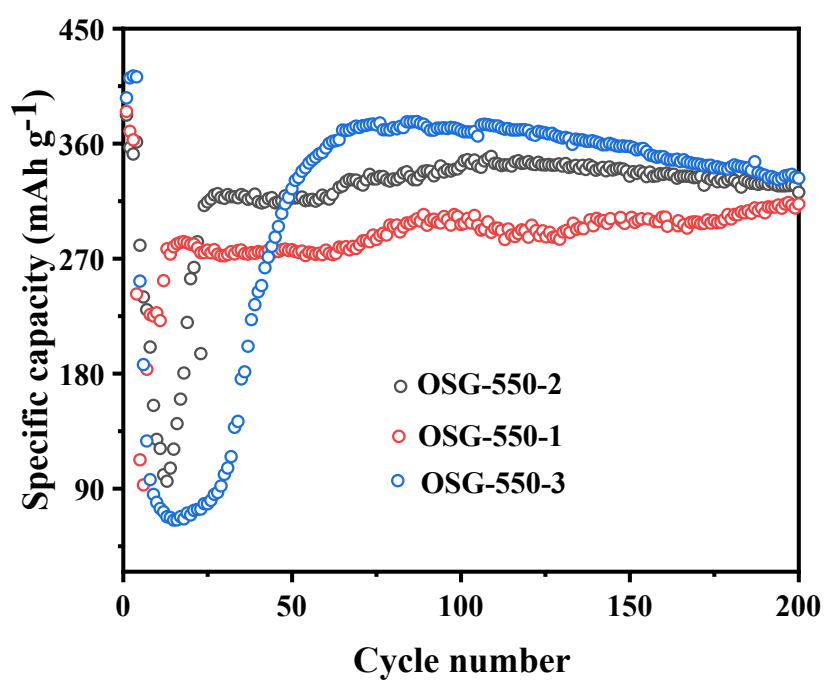

Figure S5 the cycle performance of OSG-550-1、OSG-550-2 and OSG-550-3.

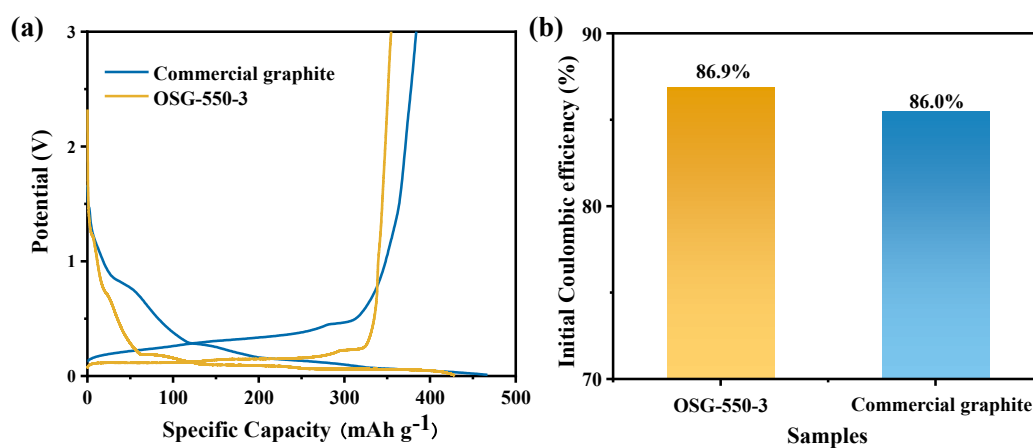

Figure S6 (a) first cycle charge-discharge curve of commercial graphite and OSG-

550-3, (b) commercial graphite and OSG-550-3 comparison of initial coulombic efficiency.

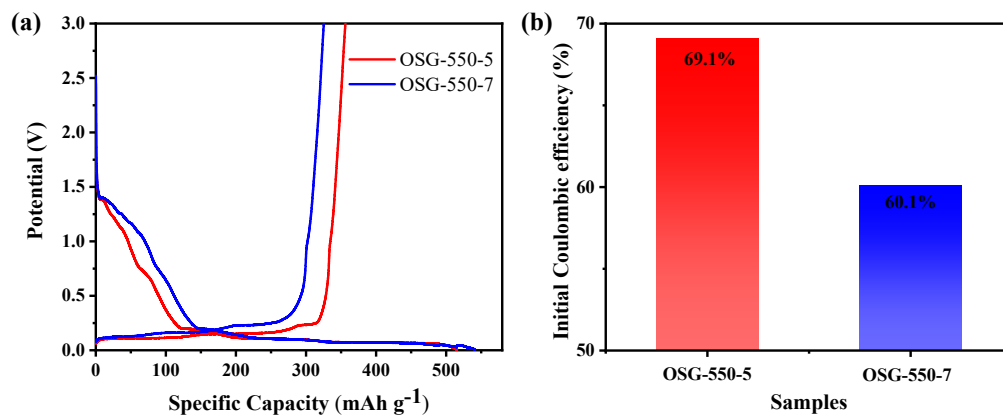

Figure S7 (a) first cycle charge-discharge curve of OSG-550-5 and OSG-550-7, (b) OSG-550-5 and OSG-550-7 comparison of initial coulombic efficiency.
